# Supplementary material for: A “soft and hard” bioinspired hydrogel for enhanced pressure sensing
Source: Royal Society of Chemistry journal article supplement (doi:10.1039/d3tc01223a), 2023-01-01
Supplement: d3tc01223a1.pdf [file d3tc01223a1.pdf]

## Supplementary Information

### “Soft and Hard” Bioinspired Hydrogel for Enhanced Pressure Sensing

Hua Yuan,<sup>ab</sup> Jian Zhang,<sup>ab</sup> Jiaqi Zhang,<sup>ab</sup> Manting Wang,<sup>ab</sup> Jiexin Wang<sup>ab</sup> and Yuan Le<sup>\*ab</sup>

<sup>a</sup> State Key Laboratory of Organic-Inorganic Composites, Beijing University of Chemical Technology, Beijing 100029, PR China.

<sup>b</sup> Research Center of the Ministry of Education for High Gravity Engineering and Technology, Beijing University of Chemical Technology, Beijing 100029, PR China.

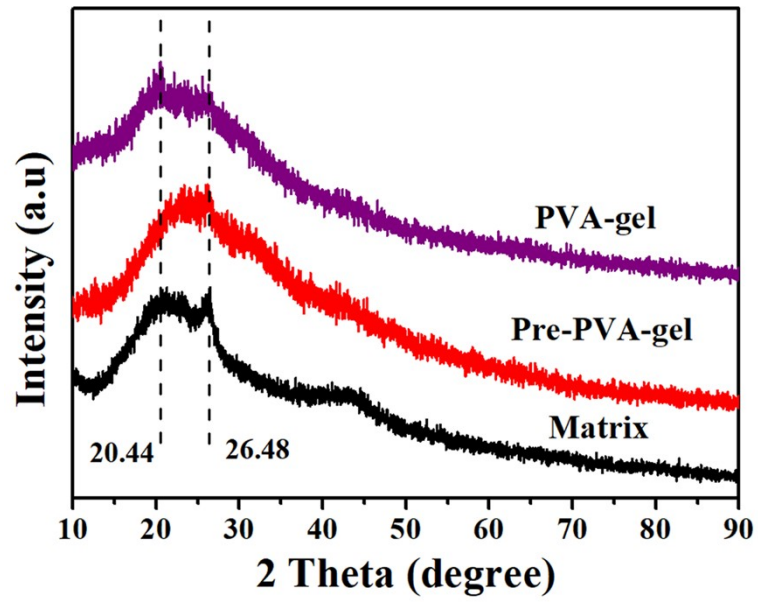

Fig. S1. XRD patterns of each product of PVA/MWCNT/CF gel transformation.

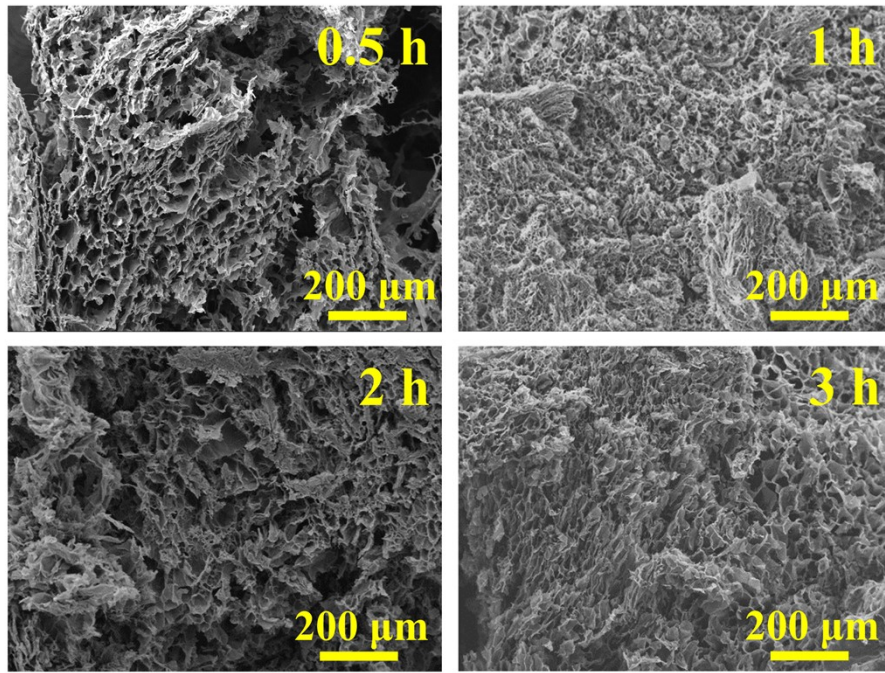

Fig. S2. SEM images of the cross-section of PVA/MWCNT/CF gels with different immersion times.

Table S1. XPS elemental analysis of PVA/MWCNT/CF gels with different immersion times.

| Atomic % | 0.5 h | 1 h   | 2 h   | 3 h   | 1 h-PVA/CF |
|----------|-------|-------|-------|-------|------------|
| C        | 65.9  | 67.91 | 66.32 | 65.78 | 63.1       |
| N        | 10.86 | 10.01 | 10.66 | 10.62 | 12.45      |
| O        | 19.46 | 17.86 | 18.81 | 19.89 | 22.4       |
| S        | 1.37  | 1.6   | 1.49  | 1.37  | 0.49       |
| Na       | 1.59  | 1.71  | 1.71  | 1.65  | 0.74       |
| Cr       | 0.81  | 0.91  | 1     | 0.69  | 0.82       |

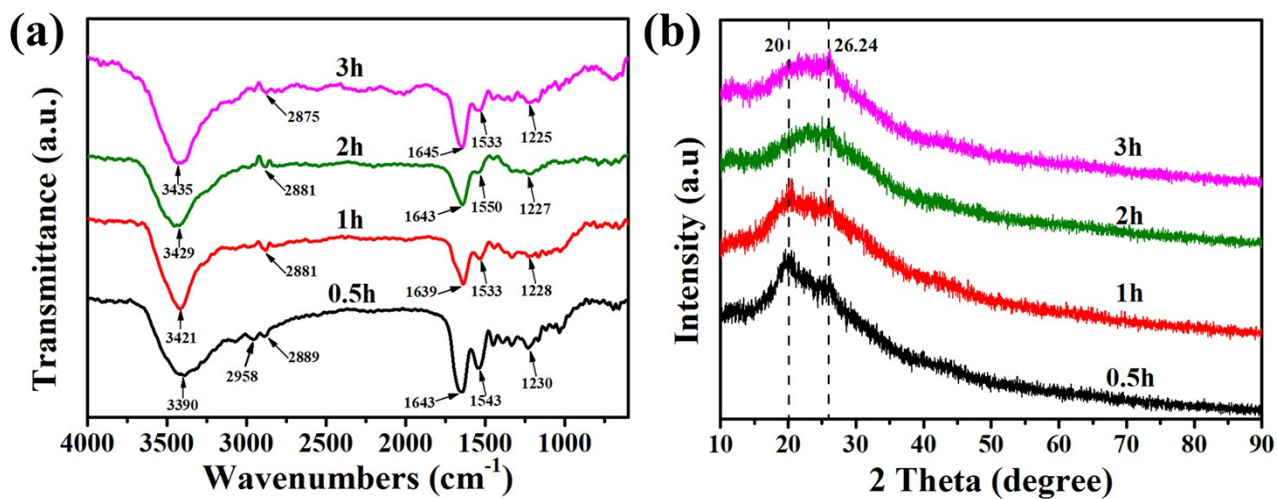

Fig. S3. (a) FTIR and (b) XRD patterns of PVA/MWCNT/CF gels with different immersion times.

Table S2. GF values of PVA/MWCNT/CF gels with different immersion times.

|       | 0-10% | 10-15% | 15-40% |
|-------|-------|--------|--------|
| 0.5 h | 13.11 | 19.24  | 24.89  |
| 1 h   | 58.01 | 157.29 | 75.74  |
| 2 h   | 25.77 | 41.24  | 53.84  |
| 3 h   | 8.27  | 10.75  | 23.58  |

Table S3. Sensitivities of PVA/MWCNT/CF gels with different immersion times.

|       | I                                  | II                                 | III                                |
|-------|------------------------------------|------------------------------------|------------------------------------|
| 0.5 h | 0.94 kPa <sup>-1</sup> (0-4 kPa)   | 0.25 kPa <sup>-1</sup> (4-10 kPa)  | 0.10 kPa <sup>-1</sup> (10-42 kPa) |
| 1 h   | 4.20 kPa <sup>-1</sup> (0-3 kPa)   | 1.09 kPa <sup>-1</sup> (3-9 kPa)   | 0.28 kPa <sup>-1</sup> (9-54 kPa)  |
| 2 h   | 1.99 kPa <sup>-1</sup> (0-2.7 kPa) | 0.73 kPa <sup>-1</sup> (2.7-7 kPa) | 0.18 kPa <sup>-1</sup> (7-65 kPa)  |
| 3 h   | 0.92 kPa <sup>-1</sup> (0-2.5 kPa) | 0.36 kPa <sup>-1</sup> (2.5-6 kPa) | 0.10 kPa <sup>-1</sup> (6-40 kPa)  |

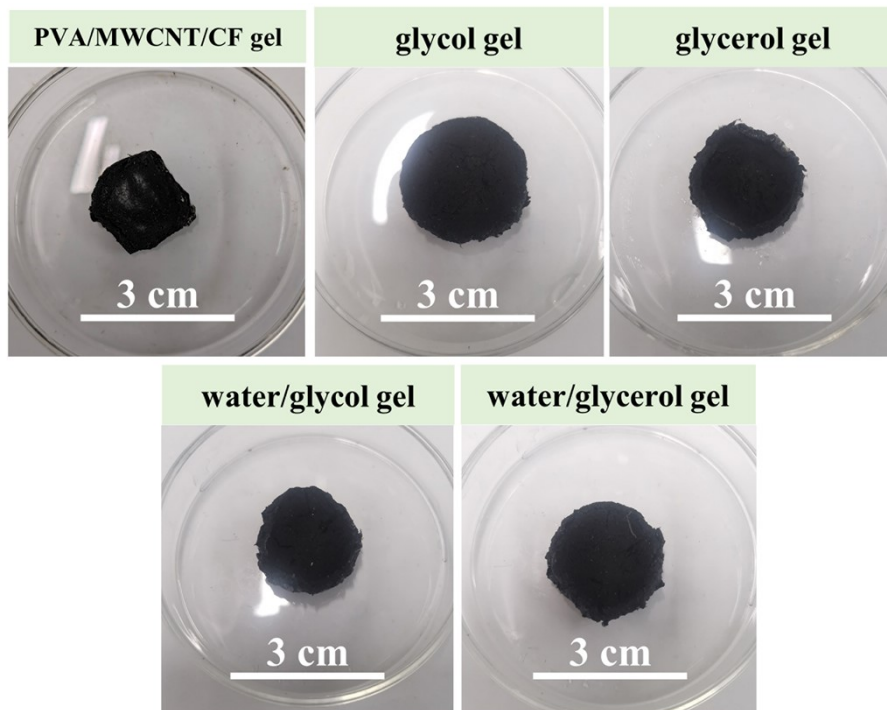

Fig. S4. Digital images of PVA/MWCNT/CF gel and various organohydrogels in ambient conditions after 7 days.



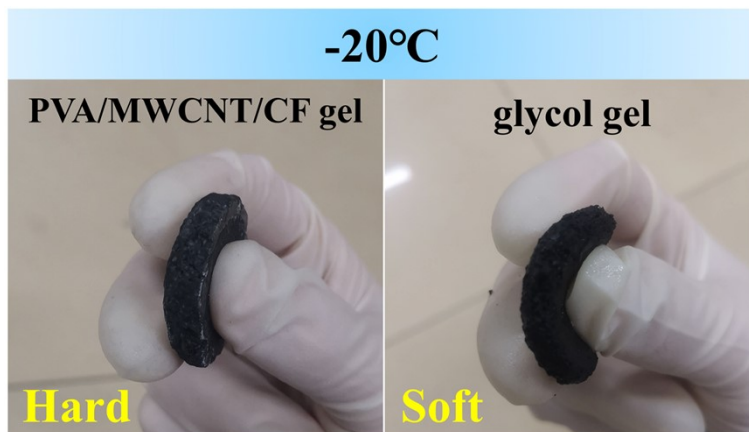

Fig. S5. Digital images of PVA/MWCNT/CF gel and glycol gel at -20°C
